# Supplementary material for: Molecular evolution of HoxA13 and the multiple origins of limbless morphologies in amphibians and reptiles
Source: PubMed Central journal article supplement — Genet Mol Biol. 2015 Aug 21;38(3):255–62. doi: 10.1590/S1415-475738320150039 (PMC4612600; doi:10.1590/s1415-475738320150039), 2015-08-21
Supplement: 1415-4757-gmb-38-3-255-suppl01.pdf [file 1415-4757-gmb-38-3-255-suppl01.pdf]

Table S1: List of species used in the bioinformatic analyzes. The species used in analyses molecular evolution of *Hoxa13* with GenBank accession numbers and museum vouchers for species sequenced for this study.

| <b>Groups</b>       | <b>Species</b>                   | <b>Museum numbers</b> | <b>GenBank Assession Numbers</b> |
|---------------------|----------------------------------|-----------------------|----------------------------------|
|                     | <i>Amphisbaena alba</i>          | UFMT-R5478            | KR136316                         |
|                     | <i>Amphisbaena hastata</i>       | CHRP281               | KR136317                         |
|                     | <i>Amphisbaena petrei</i>        | MUFAL9054-1/2         | KR136318                         |
|                     | <i>Leposternum polystegum</i>    | CHUNB30669            | KR136319                         |
| <b>Amphisbaenia</b> | <i>Cercolophia cuiabana</i>      | TMOTT204              | KR136320                         |
|                     | <i>Amphisbaena cubana</i>        |                       | DQ119602.1                       |
|                     | <i>Blanus strauchi</i>           |                       | EU203614.1                       |
|                     | <i>Rhineura floridana</i>        |                       | DQ119600.1                       |
|                     | <i>Bipes biporus</i>             |                       | DQ119601.1                       |
|                     | <i>Trogonophis wiegmanni</i>     |                       | DQ119603.1                       |
|                     | <i>Agama agama</i>               |                       | AF083099.1                       |
|                     | <i>Cyclura nubila</i>            |                       | DQ119608.1                       |
| <b>Lizards</b>      | <i>Leiocephalus barahonensis</i> |                       | DQ119607.1                       |
|                     | <i>Varanus dumerilli</i>         |                       | AF083102.1                       |
|                     | <i>Heloderma suspectum</i>       |                       | DQ119604.1                       |
|                     | <i>Xantusia riversiana</i>       |                       | DQ119596.1                       |
|                     | <i>Typhlops richardi</i>         |                       | AF083103.1                       |
|                     | <i>Ramphotyphlops braminus</i>   |                       | EF456654.1                       |
|                     | <i>Liasis savuensis</i>          |                       | FJ433946.1                       |
| <b>Serpentes</b>    | <i>Charina trivirgata</i>        |                       | AF083104.1                       |
|                     | <i>Agkistrodon contortrix</i>    |                       | EF456655.1                       |
|                     | <i>Micrurus fulvius</i>          |                       | EF456656.1                       |
|                     | <i>Dendroaspis jamesoni</i>      |                       | EF456657.1                       |
|                     | <i>Coluber constrictor</i>       |                       | EF456660.1                       |
|                     | <i>Lampropeltis getula</i>       |                       | EF456658.1                       |
|                     | <i>Pantherophis obsoletus</i>    |                       | EF456659.1                       |

|                    |                                     |                        |            |
|--------------------|-------------------------------------|------------------------|------------|
|                    | <i>Ambystoma maculatum</i>          | HERA.012588            | KR136321   |
|                    | <i>Amphiuma trydactylum</i>         | HERA.012134            | KR136322   |
|                    | <i>Cryptobranchus alleganiensis</i> | HERA.011881            | KR136323   |
| <b>Caudata</b>     | <i>Desmognathus fuscus</i>          | HERA.011789            | KR136324   |
|                    | <i>Eurycea bislineata</i>           | HERA.012599            | KR136325   |
|                    | <i>Necturus maculosus</i>           | HERA.006232            | KR136326   |
|                    | <i>Notophthalmus viridescens</i>    | HERA.010021            | KR136327   |
|                    | <i>Ambystoma mexicanum</i>          |                        | EF456666.1 |
|                    | <i>Gymnopsis multiplicata</i>       |                        | EF456665.1 |
|                    | <i>Caecilia tentaculata</i>         | Private collection MTU | KR136328   |
| <b>Gymnophiona</b> | <i>Microcaecilia sp</i>             | Private collection MTU | KR136329   |
|                    | <i>Siphonops paulensis</i>          | UFRGST2227             | KR136330   |
|                    | <i>Chthonerpeton indistinctum</i>   | UFRGST1152             | KR136331   |
|                    | <i>Luetkenotyphlus brasiliensis</i> | UFRGST1162             | KR136332   |
|                    | <i>Xenopus laevis</i>               |                        | AF107227.1 |
|                    | <i>Bufo guttatus</i>                | Private collection MTU | KR136333   |
|                    | <i>Colosthetus sp</i>               | Private collection MTU | KR136334   |
| <b>Anura</b>       | <i>Dermatonotus muelleri</i>        | Private collection MTU | KR136335   |
|                    | <i>Pipa pipa</i>                    | Private collection MTU | KR136336   |
|                    | <i>Rana catesbeiana</i>             | Private collection MTU | KR136337   |
|                    | <i>Leptodactylus fuscus</i>         | Private collection MTU | KR136338   |
