# Supplementary figures and images for: Molecular evolution of HoxA13 and the multiple origins of limbless morphologies in amphibians and reptiles
Source: PubMed Central journal article supplement — Genet Mol Biol. 2015 Aug 21;38(3):255–62. doi: 10.1590/S1415-475738320150039 (PMC4612600; doi:10.1590/s1415-475738320150039), 2015-08-21

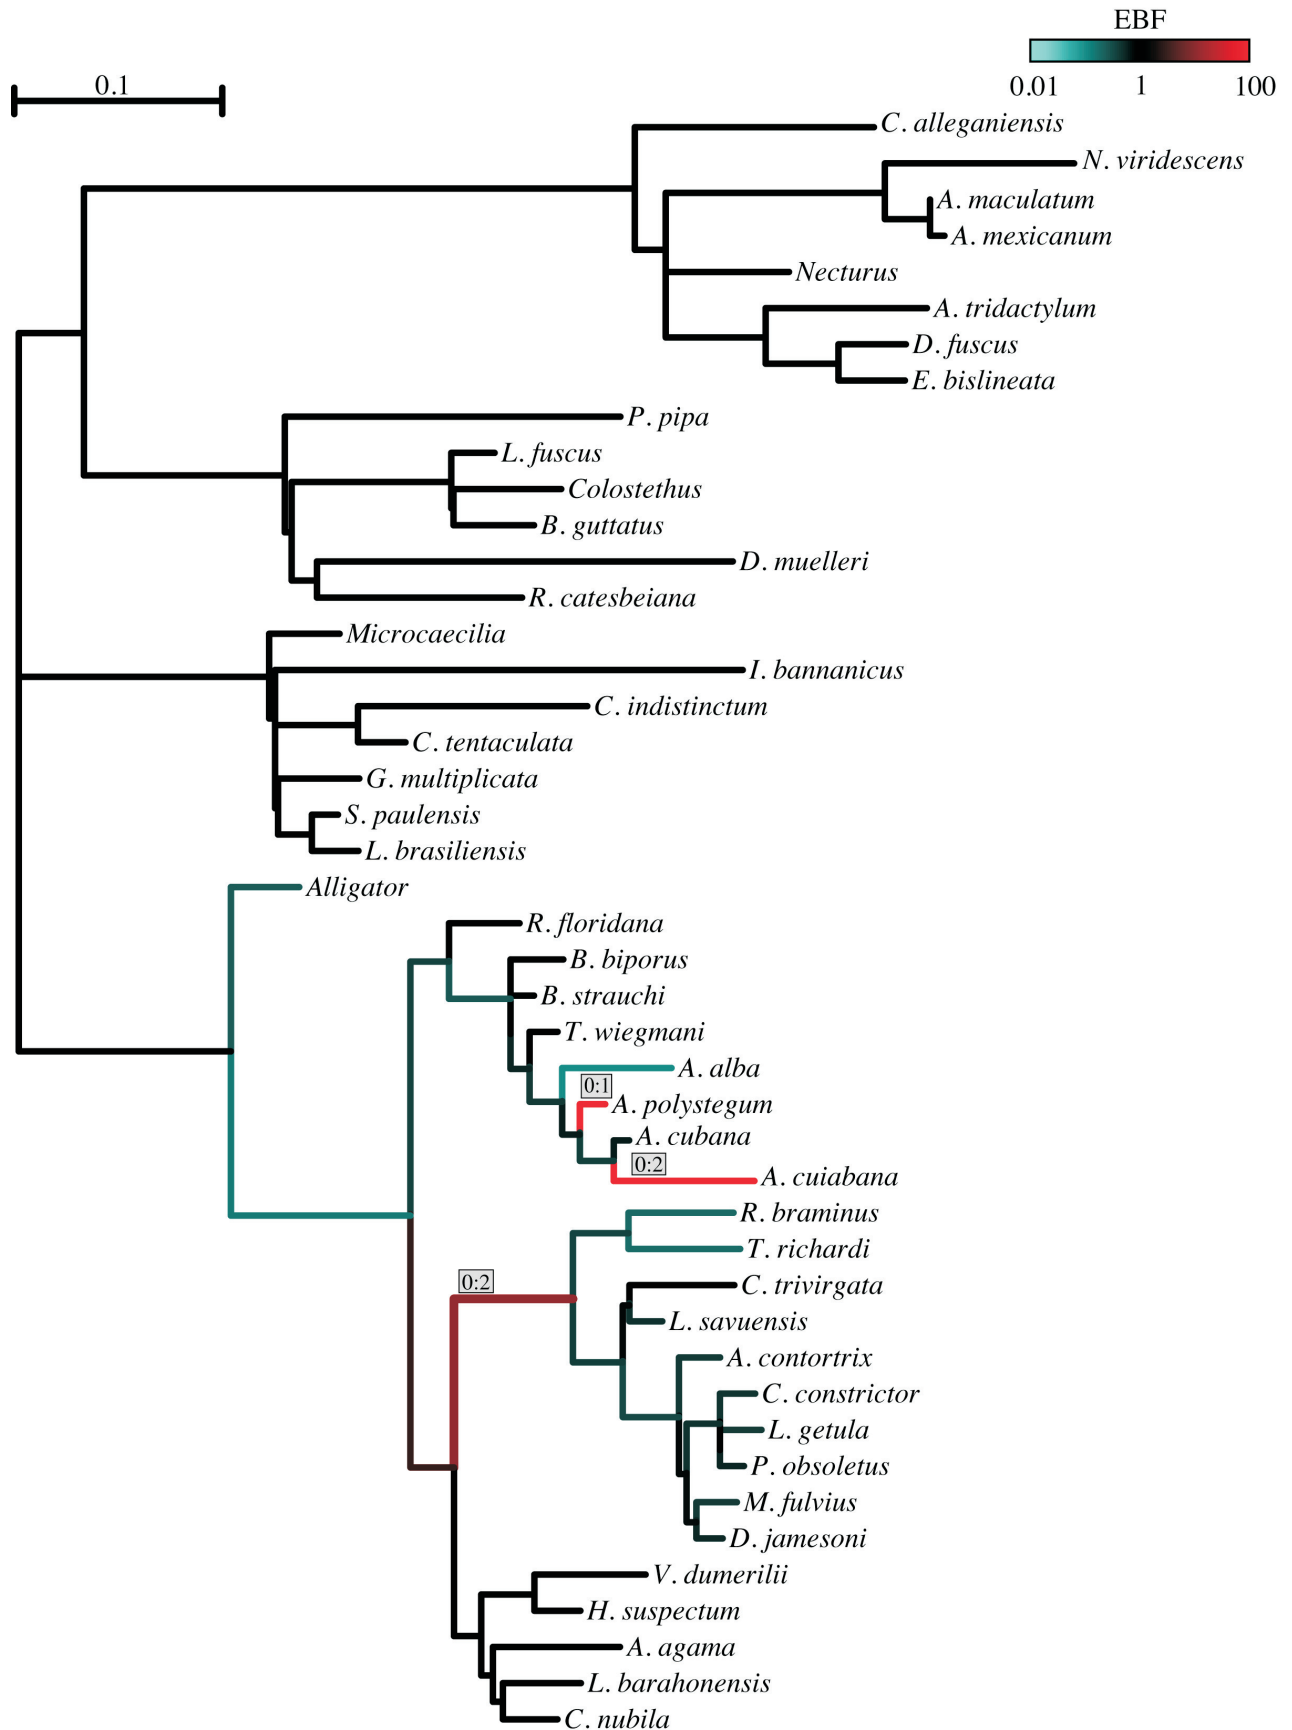

Figure S1 - Results from HyPhy analyses in the Datamonkey server.

Supplement: 1415-4757-gmb-38-3-255-suppl02.pdf [file 1415-4757-gmb-38-3-255-suppl02.pdf]
